# Supplementary material for: Evolutionary expansion of the Ras switch regulatory module in eukaryotes
Source: PubMed Central journal article supplement — Nucleic Acids Res. 2011 Mar 28;39(13):5526–37. doi: 10.1093/nar/gkr154 (PMC3141262; doi:10.1093/nar/gkr154), 2011-03-28
Supplement: supp_gkr154_diezsupp.pdf [file supp_gkr154_diezsupp.pdf]

# Evolutionary expansion of the Ras switch regulatory module in eukaryotes

## (Supporting Material)

Diego Díez<sup>1,2\*</sup>, Francisca Sánchez-Jiménez<sup>3</sup> and Juan A. G. Ranea<sup>3</sup>

<sup>1</sup>Bioinformatics Center, Institute for Chemical Research, Kyoto University, Uji, Kyoto 611-0011 Japan

<sup>2</sup>Instituto de Investigaciones Biomédicas, CSIC-UAM, 28029 Madrid, Spain

<sup>3</sup>Department of Molecular Biology and Biochemistry-CIBER de Enfermedades Raras, University of Malaga, Malaga, Spain

### **\*Corresponding author:**

Diego Díez

Bioinformatics Center, Institute for Chemical Research, Kyoto University  
Gokasho, Uji, Kyoto 611-0011, JAPAN

Phone: +81-0774-38-3296

Fax: +81-0774-38-3269

E-mail: diez@kuicr.kyoto-u.ac.jp

**Table S1** List of species included in this analysis. Most genomes were downloaded from Ensembl. Scientific name, short name, source database, assembly version and URL are indicated.

| <i>Species</i>         | <i>Alias</i> | <i>Assembly</i> | <i>Source/Url</i>                                                                                                         |
|------------------------|--------------|-----------------|---------------------------------------------------------------------------------------------------------------------------|
| <i>S. cerevisiae</i>   | yeast        | SGD1.01         |                                                                                                                           |
| <i>C. elegans</i>      | worm         | WS190           |                                                                                                                           |
| <i>A. gambiae</i>      | mosquito     | AgamP3          |                                                                                                                           |
| <i>D. melanogaster</i> | fly          | BDGP 5.4        |                                                                                                                           |
| <i>D. rerio</i>        | zebrafish    | Zv8             |                                                                                                                           |
| <i>T. rubripes</i>     | fugu         | FUGU 4.0        |                                                                                                                           |
| <i>C. intestinalis</i> | ciona        | JGI 2           |                                                                                                                           |
| <i>X. tropicalis</i>   | xenopus      | JGI 4.1         |                                                                                                                           |
| <i>G. gallus</i>       | chicken      | WASHUC2         | <a href="#">Ensembl</a>                                                                                                   |
| <i>T. guttata</i>      | finch        | TG-3.2.4        | <a href="http://www.ensembl.org">http://www.ensembl.org</a>                                                               |
| <i>A. carolinensis</i> | anolis       | AnoCar1.0       |                                                                                                                           |
| <i>O. anatinus</i>     | platypus     | OA-5.0          |                                                                                                                           |
| <i>M. domestica</i>    | monodephils  | monDom5         |                                                                                                                           |
| <i>B. taurus</i>       | cow          | Btau_4.0        |                                                                                                                           |
| <i>R. norvegicus</i>   | rat          | RGSC 3.4        |                                                                                                                           |
| <i>M. musculus</i>     | mouse        | NCBIM37         |                                                                                                                           |
| <i>P. troglodites</i>  | chimp        | CHIMP2.1        |                                                                                                                           |
| <i>H. sapiens</i>      | human        | NCBI36          |                                                                                                                           |
| <i>C. albicans</i>     | candida      | 21              | <a href="#">CandidaGenomeDB</a><br><a href="http://www.candidagenome.org">http://www.candidagenome.org</a>                |
| <i>S. pombe</i>        | pombe        |                 | <a href="#">Sanger</a><br><a href="http://www.sanger.ac.uk/Projects/S_pombe">http://www.sanger.ac.uk/Projects/S_pombe</a> |
| <i>D. discoideum</i>   | slime        |                 | <a href="#">DictyBase</a><br><a href="http://dictybase.org">http://dictybase.org</a>                                      |
| <i>S. purpuratus</i>   | seaurchin    | 2.1             | <a href="#">SpBase</a><br><a href="http://www.spbase.org/SpBase/index.php">http://www.spbase.org/SpBase/index.php</a>     |
| <i>M. brevicollis</i>  | monosiga     | 1               | <a href="http://genome.jgi-psf.org/Monbr1">http://genome.jgi-psf.org/Monbr1</a>                                           |
| <i>A. thaliana</i>     | arabidopsis  | TAIR8           | <a href="#">Gramene</a><br><a href="http://www.gramene.org">http://www.gramene.org</a>                                    |

**Table S2** Rates of duplication relative to Ras for individual species.

| <i>Organism</i> | <i>GEF</i> | <i>RasGAP</i> | <i>RapGAP</i> |
|-----------------|------------|---------------|---------------|
| human           | 0.78       | 0.41          | 0.27          |
| chimp           | 0.75       | 0.42          | 0.28          |
| mouse           | 0.68       | 0.37          | 0.26          |
| rat             | 0.62       | 0.33          | 0.23          |
| cow             | 0.79       | 0.39          | 0.30          |
| opossum         | 0.58       | 0.30          | 0.20          |
| platypus        | 0.67       | 0.44          | 0.37          |
| chicken         | 0.65       | 0.35          | 0.26          |
| finch           | 0.53       | 0.41          | 0.26          |
| anolis          | 0.69       | 0.26          | 0.23          |
| xenopus         | 0.70       | 0.30          | 0.18          |
| zebrafish       | 0.59       | 0.35          | 0.30          |
| fugu            | 0.71       | 0.37          | 0.34          |
| ciona           | 0.58       | 0.42          | 0.33          |
| seaurchin       | 0.19       | 0.15          | 0.09          |
| mosquito        | 0.45       | 0.20          | 0.30          |
| fly             | 0.50       | 0.25          | 0.20          |
| worm            | 0.73       | 0.45          | 0.27          |
| monosiga        | 1.86       | 1.43          | 0.57          |
| pombe           | 1.00       | 1.00          | 0.50          |
| yeast           | 0.80       | 0.80          | 0.00          |
| candida         | 1.33       | 1.00          | 0.33          |
| slime           | 1.45       | 0.70          | 0.55          |

**Figure S1** Correlation between gene numbers and genome size/divergence time before removing the effect of outliers. The linear fit includes all species except *Arabidopsis*.

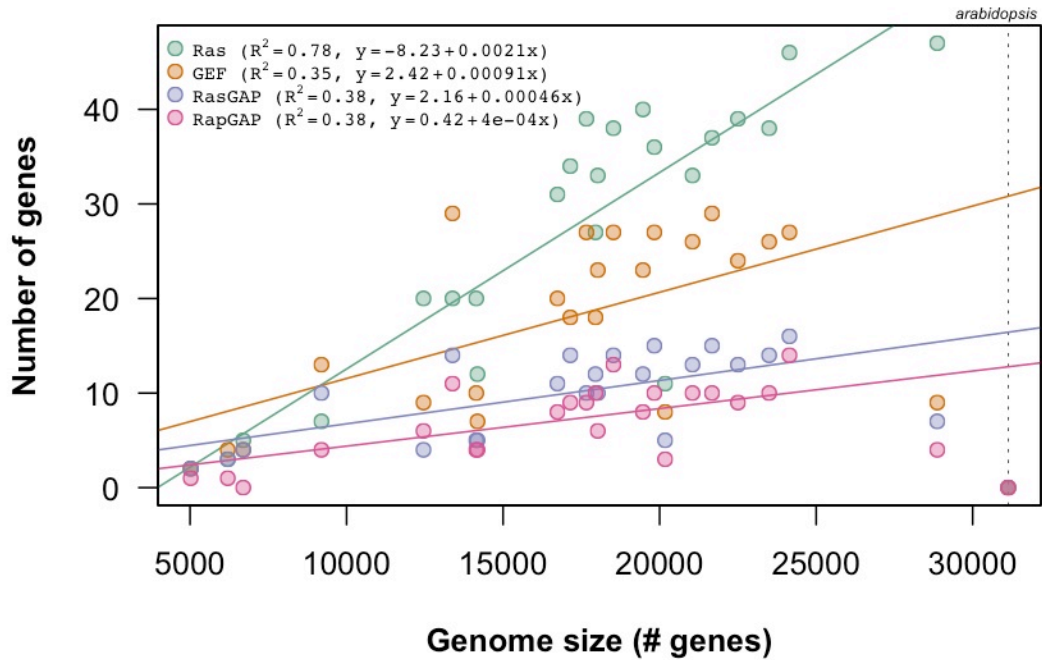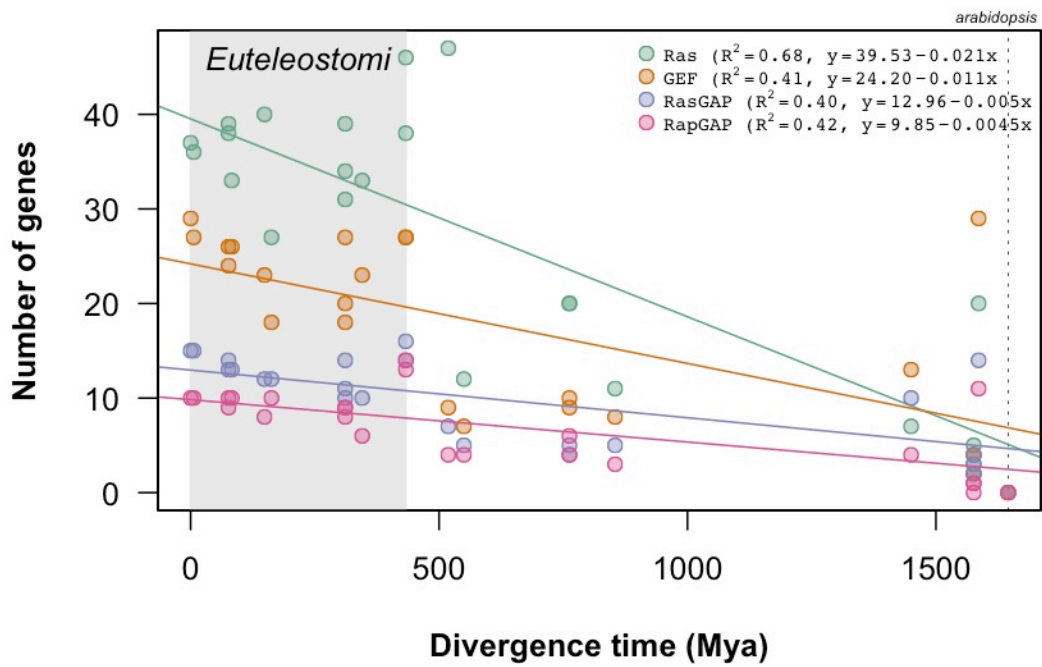

**Figure S6** Frequency of domains (unique) per architecture (number of genes with each number of domains in their sequence).

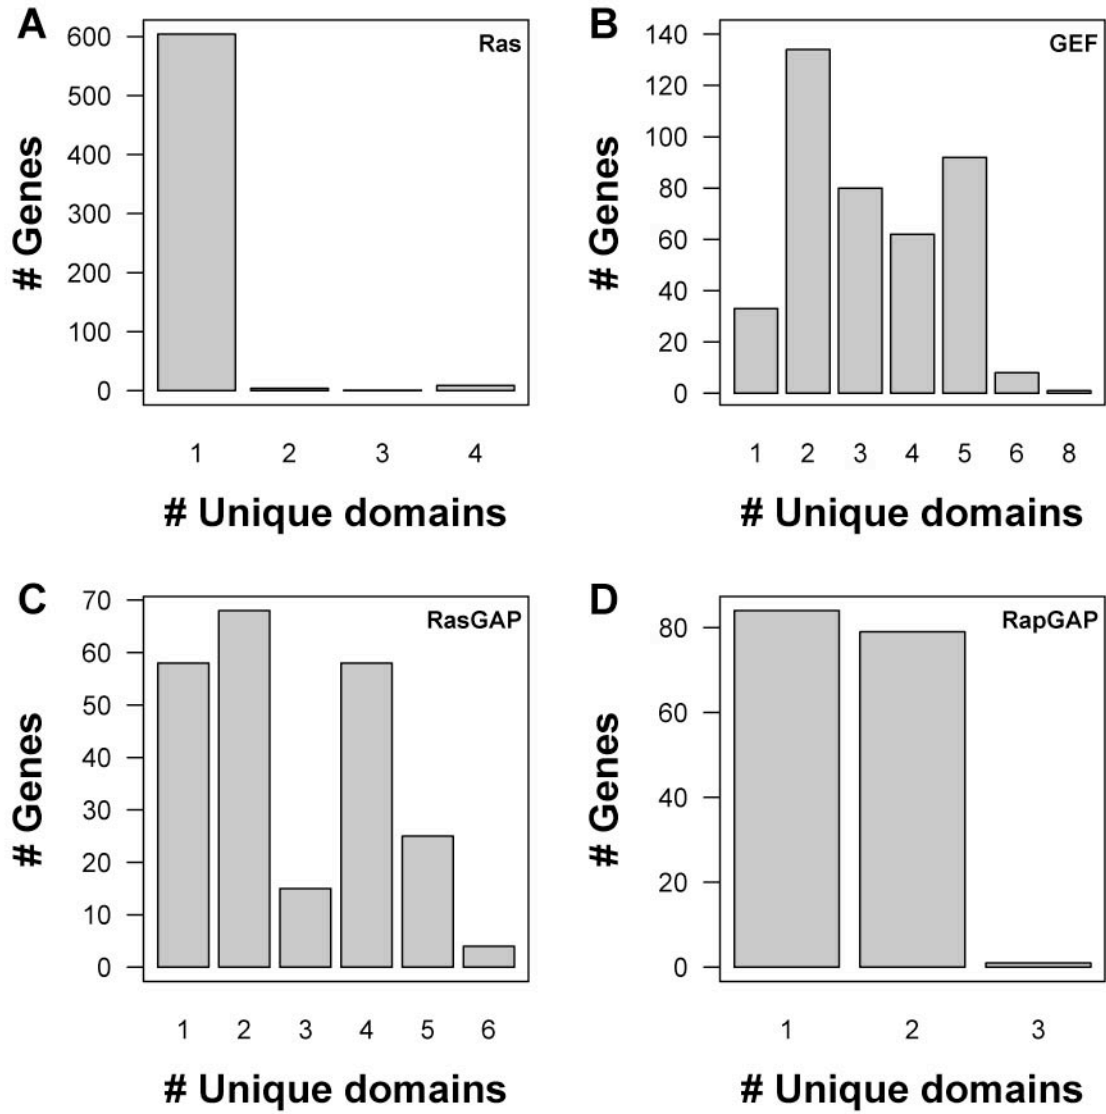

**Figure S7** Frequency of domains per architecture (number of genes with each number of domains in their sequence).

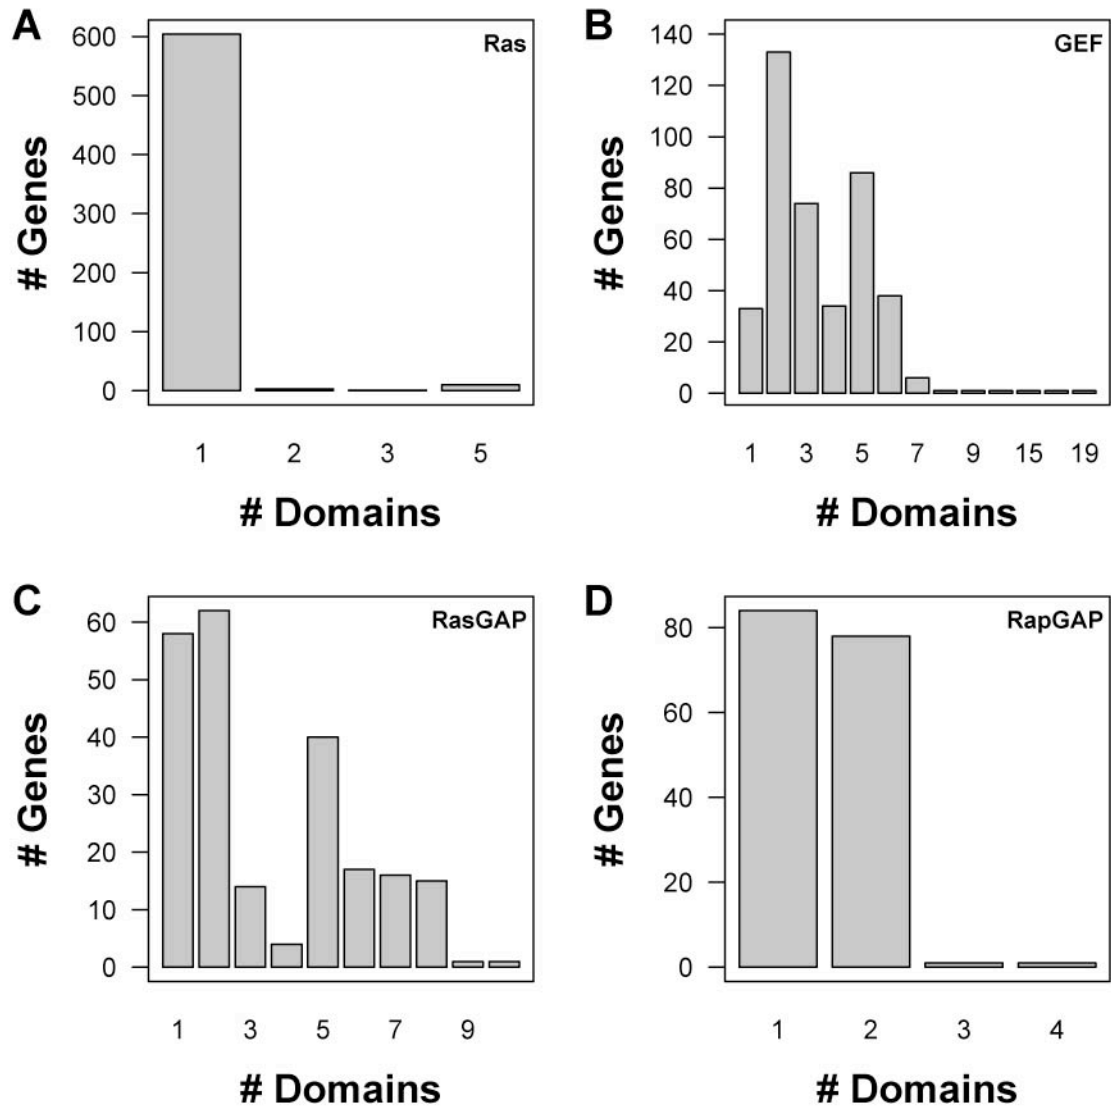

**Figure S8** Distribution of domain counts across species for A) Ras, B) RapGAP, C) RasGAP and D) RasGEF. The color scale indicates the percentage of sequences with that domain in the corresponding species. Domain frequency distribution is shown for each family.

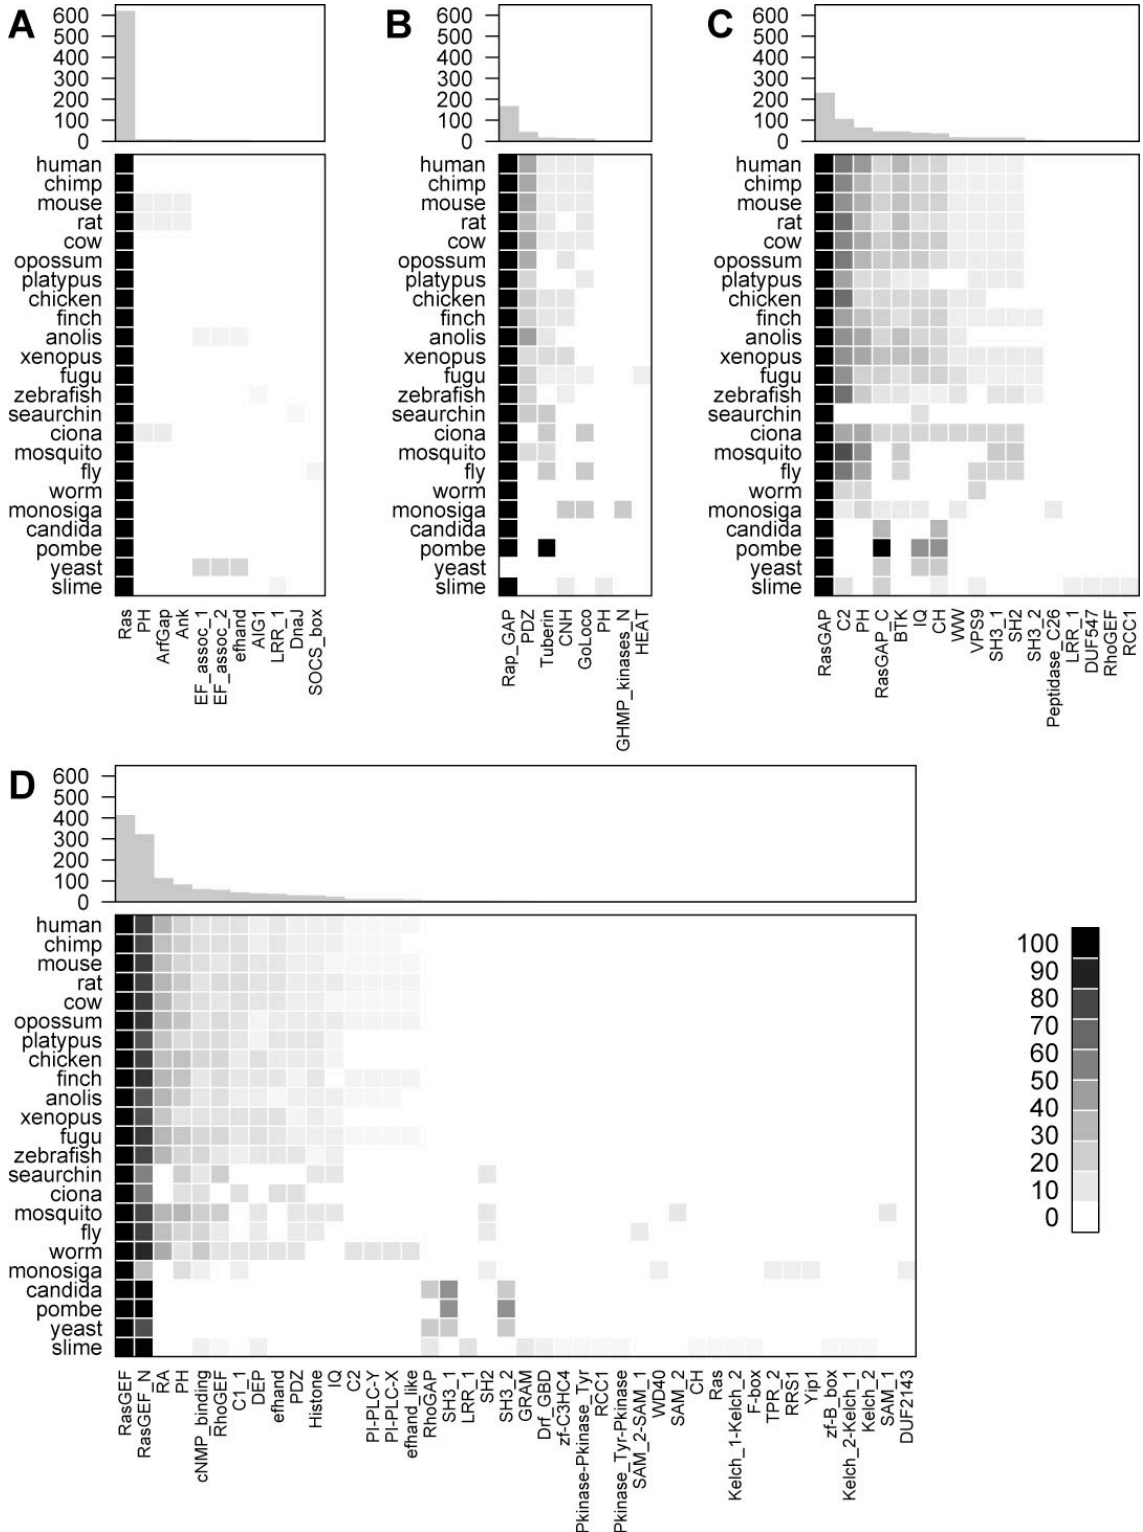





|      |                                                 |
|------|-------------------------------------------------|
| III  | Ras   efhand   EF_assoc_2   efhand   EF_assoc_1 |
| IV   | Ras   LRR_1   LRR_1   LRR_1   LRR_1             |
| V    | Ras   DnaJ                                      |
| VI   | Ras   PH   ArfGap                               |
| VII  | AIG1   Ras                                      |
| VIII | Ras   SOCS_box                                  |

---

### RAPGAP

|      |                                 |
|------|---------------------------------|
| I    | Rap_GAP                         |
| II   | Rap_GAP   PDZ                   |
| III  | Tuberin   Rap_GAP               |
| IV   | Rap_GAP   CNH                   |
| V    | GoLoco   Rap_GAP                |
| VI   | GHMP_kinases_N   Rap_GAP        |
| VII  | PH   PH   Rap_GAP               |
| VIII | HEAT   HEAT   Tuberin   Rap_GAP |

---

### RASGAP

|        |                                                                        |
|--------|------------------------------------------------------------------------|
| I      | RasGAP                                                                 |
| II     | C2   RasGAP                                                            |
| III    | C2   C2   RasGAP   PH   BTK                                            |
| IV     | RasGAP   VPS9                                                          |
| V      | CH   WW   IQ   IQ   IQ   IQ   RasGAP   RasGAP_C                        |
| VI     | CH   IQ   IQ   IQ   IQ   RasGAP   RasGAP_C                             |
| VII    | SH2   SH3_1   SH2   PH   C2   RasGAP                                   |
| VIII   | RasGAP   RasGAP_C                                                      |
| IX     | PH   C2   RasGAP                                                       |
| X      | CH   IQ   IQ   IQ   RasGAP   RasGAP_C                                  |
| XI     | SH2   SH3_1   SH3_2   SH2   PH   C2   RasGAP                           |
| XII    | C2   C2   RasGAP                                                       |
| XIII   | RasGAP   PH   BTK                                                      |
| XIV    | IQ   IQ   RasGAP   RasGAP_C                                            |
| XV     | CH   CH   RasGAP                                                       |
| XVI    | RCC1   RCC1   RCC1   RCC1   RCC1   RhoGEF   RasGAP                     |
| XVII   | SH3_1   SH2   PH   C2   RasGAP                                         |
| XVIII  | CH   IQ   IQ   IQ   IQ   IQ   IQ   IQ   IQ   IQ   RasGAP   RasGAP_C    |
| XIX    | C2   C2   RasGAP   BTK                                                 |
| XX     | WW   IQ   IQ   IQ   RasGAP   RasGAP_C                                  |
| XXI    | C2   RasGAP   BTK                                                      |
| XXII   | C2   RasGAP   PH   BTK                                                 |
| XXIII  | CH   IQ   IQ   IQ   IQ   IQ   RasGAP   RasGAP_C                        |
| XXIV   | RasGAP   Peptidase_C26                                                 |
| XXV    | IQ   IQ   IQ   IQ   RasGAP   RasGAP_C                                  |
| XXVI   | SH3_1   SH3_2   SH2   PH   C2   RasGAP                                 |
| XXVII  | RasGAP   LRR_1   LRR_1   LRR_1   LRR_1   LRR_1   LRR_1   LRR_1   LRR_1 |
| XXVIII | RasGAP   PH                                                            |
| XXIX   | RasGAP   DUF547                                                        |
| XXX    | WW   RasGAP   RasGAP_C                                                 |
| XXXI   | CH   RasGAP   RasGAP_C                                                 |
| XXXII  | IQ   IQ   IQ   IQ   RasGAP                                             |

---

| <b>RASGEF</b> |                                                                                                                                                                             |
|---------------|-----------------------------------------------------------------------------------------------------------------------------------------------------------------------------|
| I             | RasGEF_N   RasGEF                                                                                                                                                           |
| II            | RasGEF_N   RasGEF   RA                                                                                                                                                      |
| III           | RasGEF                                                                                                                                                                      |
| IV            | Histone   RhoGEF   PH   RasGEF_N   RasGEF                                                                                                                                   |
| V             | RasGEF   PH                                                                                                                                                                 |
| VI            | RasGEF_N   RasGEF   ehand   ehand   C1_1                                                                                                                                    |
| VII           | cNMP_binding   RasGEF_N   PDZ   RA   RasGEF                                                                                                                                 |
| VIII          | PH   IQ   RhoGEF   PH   RasGEF_N   RasGEF                                                                                                                                   |
| IX            | cNMP_binding   DEP   cNMP_binding   RasGEF_N   RA   RasGEF                                                                                                                  |
| X             | DEP   cNMP_binding   RasGEF_N   RasGEF                                                                                                                                      |
| XI            | RasGEF   ehand_like   PI-PLC-X   PI-PLC-Y   C2   RA   RA                                                                                                                    |
| XII           | RasGEF_N   RasGEF   C1_1                                                                                                                                                    |
| XIII          | RasGEF_N   RasGEF   ehand   C1_1                                                                                                                                            |
| XIV           | IQ   RhoGEF   PH   RasGEF_N   RasGEF                                                                                                                                        |
| XV            | DEP   RasGEF_N   RasGEF                                                                                                                                                     |
| XVI           | DEP   RasGEF_N   RA   RasGEF                                                                                                                                                |
| XVII          | RasGEF   RA                                                                                                                                                                 |
| XVIII         | cNMP_binding   cNMP_binding   RasGEF_N   PDZ   RA   RasGEF                                                                                                                  |
| XIX           | RA   RasGEF                                                                                                                                                                 |
| XX            | RasGEF   ehand   C1_1                                                                                                                                                       |
| XXI           | DEP   cNMP_binding   RasGEF_N   RA   RasGEF                                                                                                                                 |
| XXII          | cNMP_binding   DEP   cNMP_binding   RasGEF_N   RasGEF                                                                                                                       |
| XXIII         | SH3_1   SH3_2   RasGEF_N   RasGEF                                                                                                                                           |
| XXIV          | RhoGEF   PH   RasGEF_N   RasGEF                                                                                                                                             |
| XXV           | RasGEF   RasGEF_N   RhoGAP                                                                                                                                                  |
| XXVI          | cNMP_binding   RasGEF_N   RasGEF                                                                                                                                            |
| XXVII         | RhoGAP   RasGEF_N   RasGEF                                                                                                                                                  |
| XXVIII        | RasGEF   C1_1                                                                                                                                                               |
| XXIX          | RasGEF   ehand_like   PI-PLC-X   PI-PLC-Y   C2   RA                                                                                                                         |
| XXX           | SAM_2-SAM_1   SH2   RasGEF                                                                                                                                                  |
| XXXI          | PH   RasGEF                                                                                                                                                                 |
| XXXII         | F-box   F-box   RasGEF_N   RasGEF                                                                                                                                           |
| XXXIII        | RasGEF_N   RA   RasGEF                                                                                                                                                      |
| XXXIV         | LRR_1   LRR_1   LRR_1   LRR_1   Ras   Pkinase_Tyr-Pkinase   RasGEF_N   DEP   RasGEF   cNMP_binding   GRAM   cNMP_binding                                                    |
| XXXV          | RasGEF_N   RasGEF   ehand   ehand                                                                                                                                           |
| XXXVI         | LRR_1   RasGEF_N   RasGEF                                           |
| XXXVII        | cNMP_binding   RasGEF_N   PDZ   RasGEF                                                                                                                                      |
| XXXVIII       | GRAM   RhoGAP   RasGEF                                                                                                                                                      |
| XXXIX         | RasGEF_N   DEP   RasGEF                                                                                                                                                     |
| XL            | cNMP_binding   cNMP_binding   RasGEF                                                                                                                                        |
| XLI           | RCC1   RCC1   RCC1   RhoGEF   RasGEF_N   RasGEF                                                                                                                             |
| XLII          | RasGEF_N   PDZ   RA   RasGEF                                                                                                                                                |
| XLIII         | LRR_1   Drf_GBD   LRR_1   RasGEF_N   RasGEF   LRR_1 |
| XLIV          | RasGEF_N   RasGEF   cNMP_binding   GRAM   cNMP_binding                                                                                                                      |



**Figure S10** Comparison of different divergence times (MYA) for the species included in this study. Blue points are fossil record estimates extracted from Benton 2007 (1). Black points are molecular distance estimates from Kumar 2003 (2). The average value used in this study is indicated with a black solid line. In general there is concordance between both measures, with the main difference in the insect's clade divergence times.

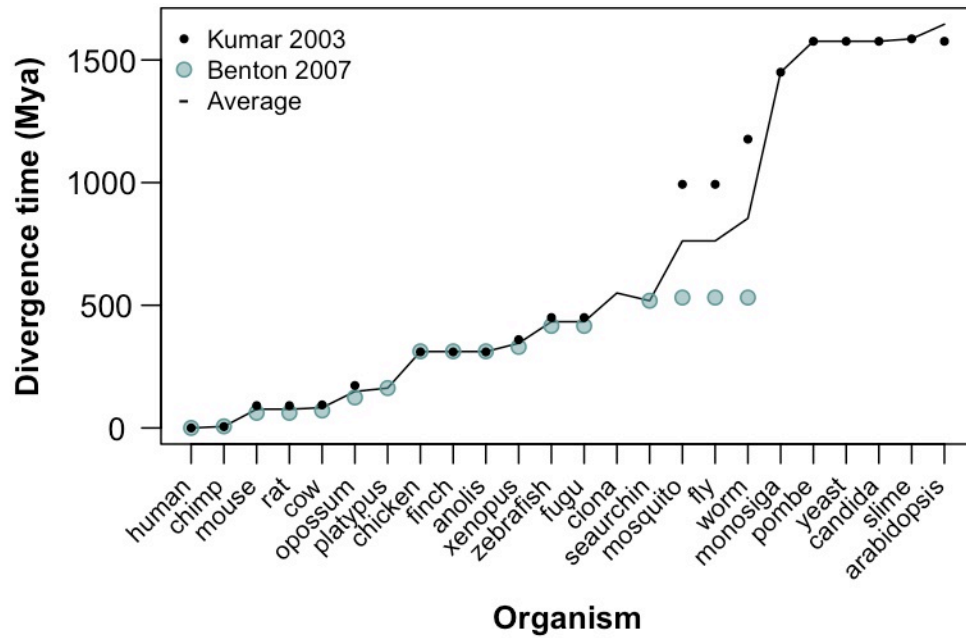

1. Donoghue, P.C. and Benton, M.J. (2007) Rocks and clocks: calibrating the Tree of Life using fossils and molecules. *Trends Ecol Evol*, **22**, 424-431.
2. Blair Hedges, S. and Kumar, S. (2003) Genomic clocks and evolutionary timescales. *Trends Genet*, **19**, 200-206.
