# Supplementary figures and images for: Evolutionary expansion of the Ras switch regulatory module in eukaryotes
Source: PubMed Central journal article supplement — Nucleic Acids Res. 2011 Mar 28;39(13):5526–37. doi: 10.1093/nar/gkr154 (PMC3141262; doi:10.1093/nar/gkr154), 2011-03-28

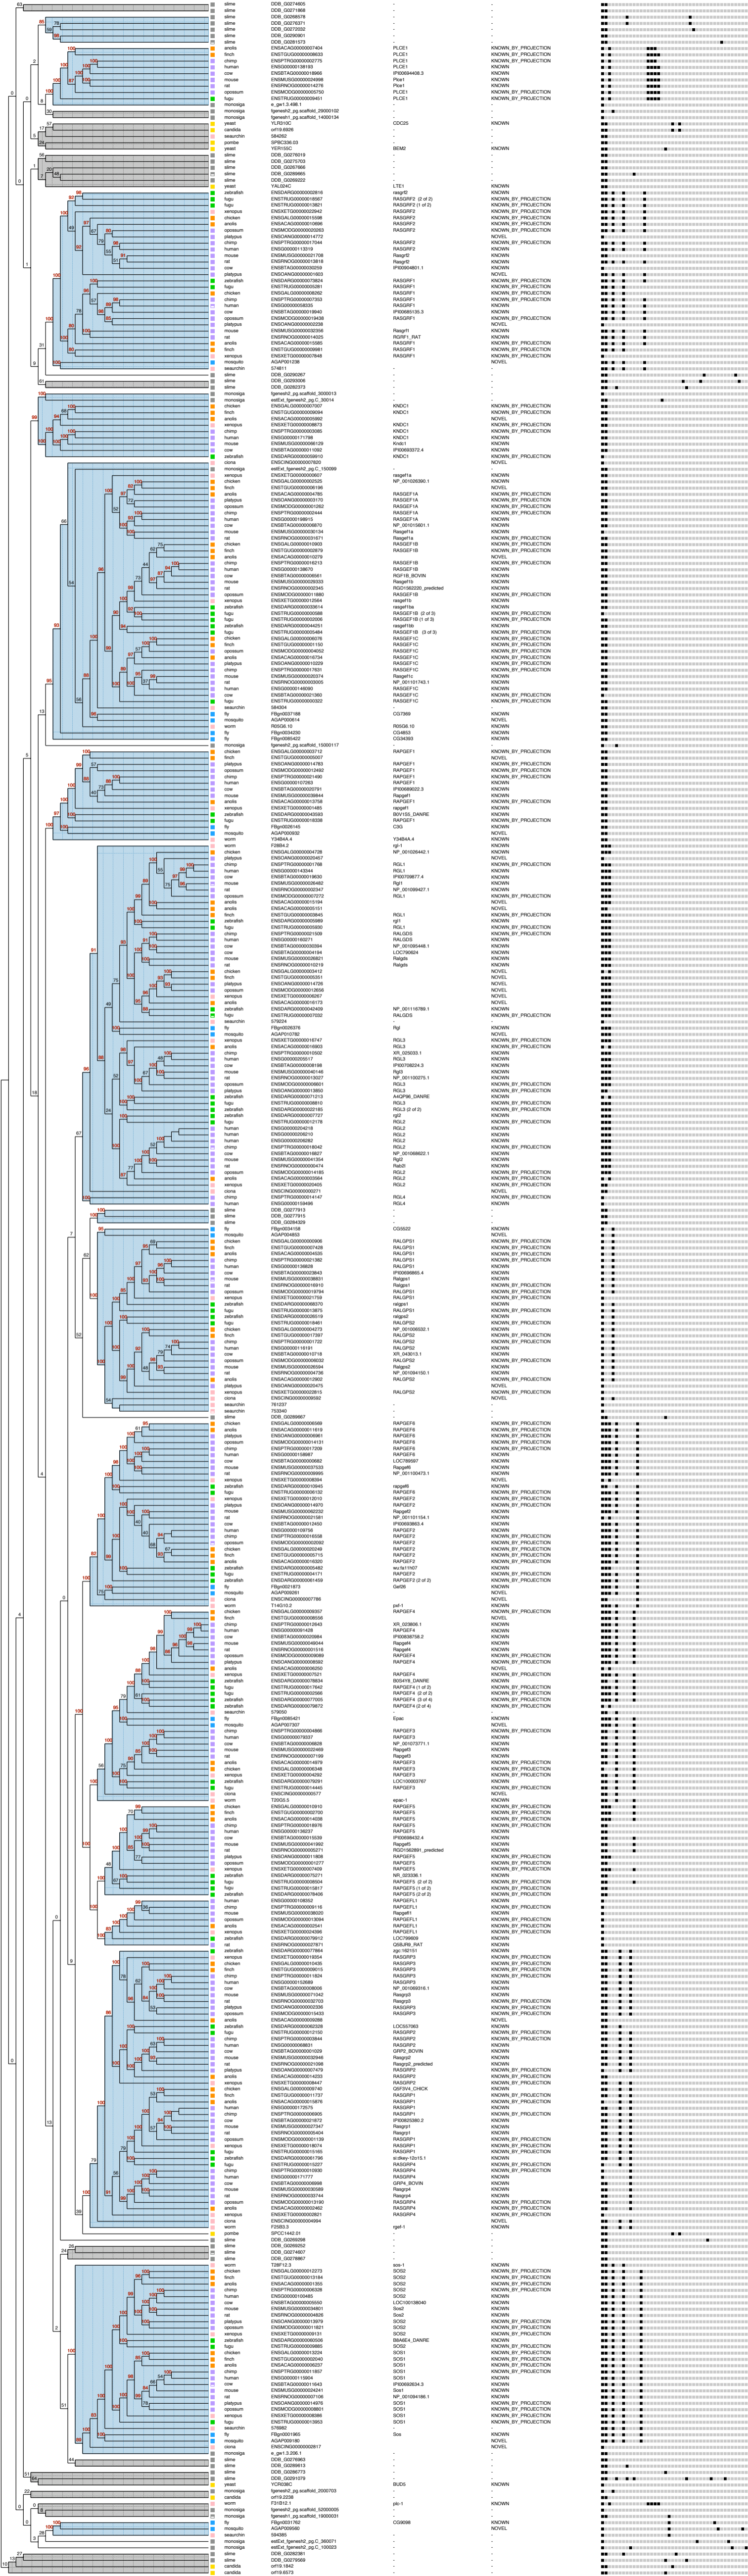

Supplement: supp_gkr154_diezfigS3.pdf [file supp_gkr154_diezfigS3.pdf]

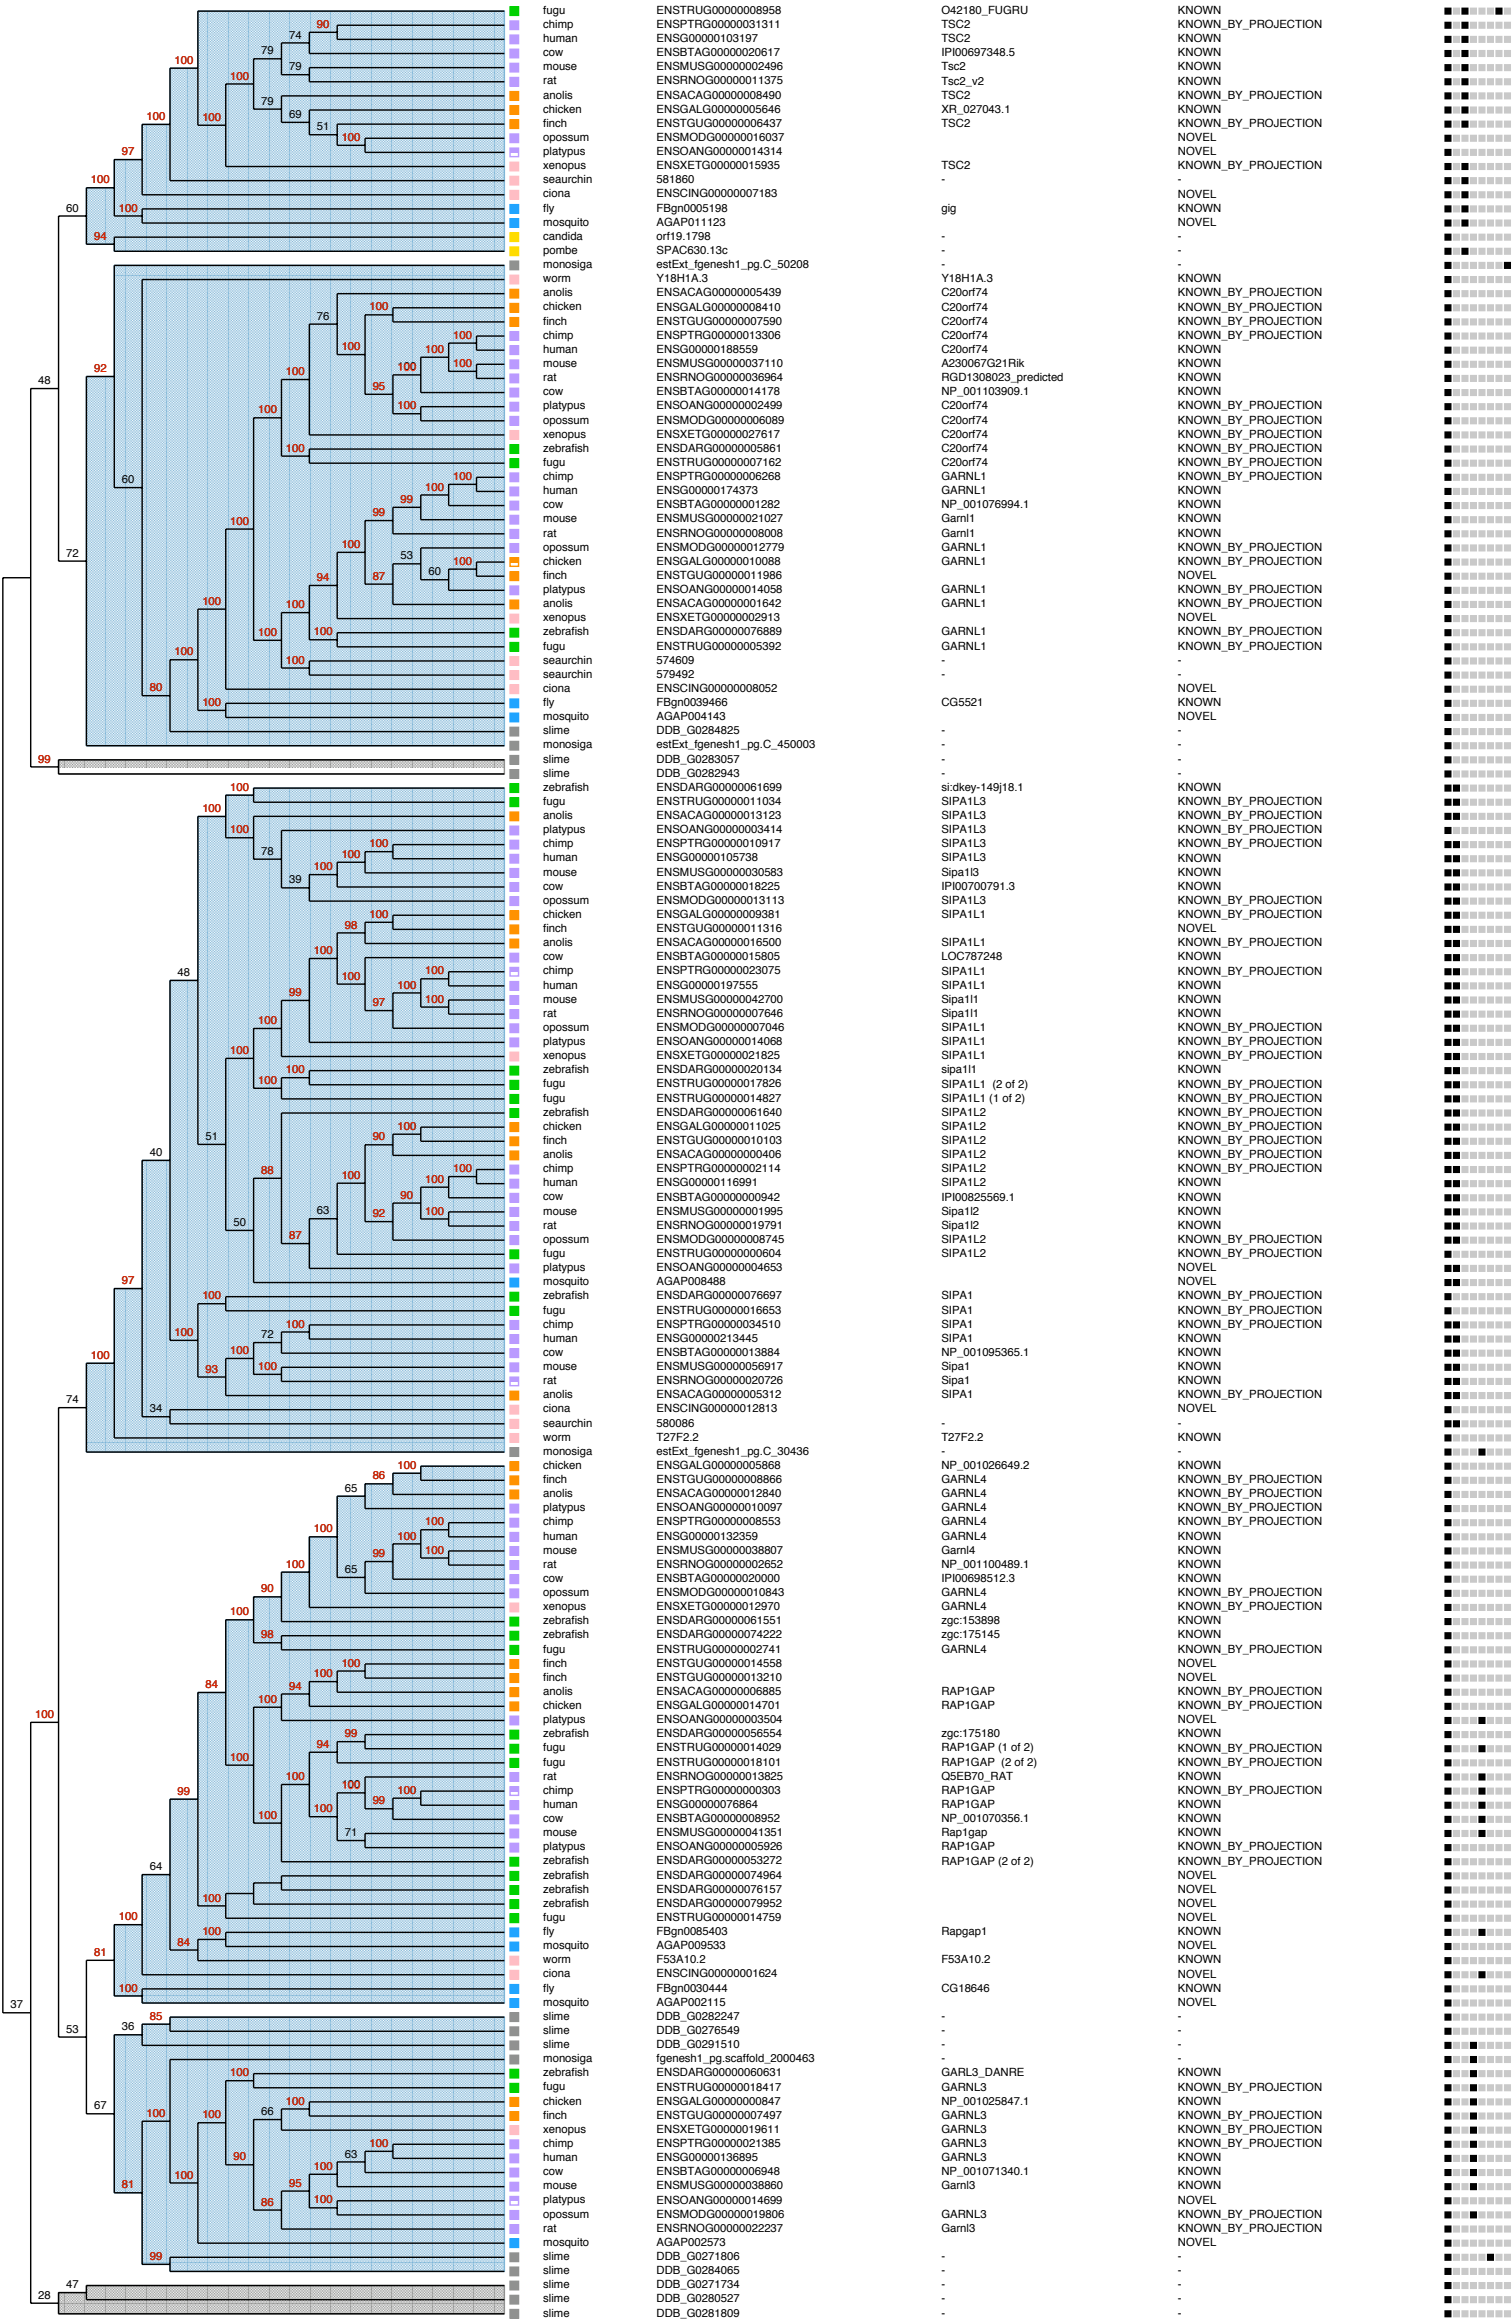

Supplement: supp_gkr154_diezfigS5.pdf [file supp_gkr154_diezfigS5.pdf]
